# Supplementary material for: A simple strategy for low-cost portable monitoring of plasma drug concentrations using a sustainable boron-doped-diamond chip
Source: Research Square preprint supplement (doi:10.21203/rs.3.rs-1645919/v1), 2022-05-18
Supplement: Supplementary file 1 [file 3f52620342587180e1ad72cd.pdf]

# **Supplementary Materials**

## **A simple strategy for low-cost portable monitoring of plasma drug concentrations using a sustainable boron-doped-diamond chip**

**Takuro Saiki<sup>1</sup>, Genki Ogata<sup>2</sup>, Seishiro Sawamura<sup>3</sup>, Kai Asai<sup>2</sup>, Olga Razvina<sup>4</sup>, Kota Watanabe<sup>5</sup>, Rito Kato<sup>5</sup>, Qi Zhang<sup>3,6</sup>, Koei Akiyama<sup>3,7</sup>, Sasya Madhurantakam<sup>3</sup>, Haruma Nashimoto<sup>8</sup>, Yoshifumi Matsumoto<sup>1</sup>, Masato Moriyama<sup>1</sup>, Arata Horii<sup>6</sup>, Chie Kondo<sup>9</sup>, Ryosuke Ochiai<sup>9</sup>, Hiroyuki Kusuhashi<sup>8</sup>, Yasuo Saijo<sup>1</sup>, Yasuaki Einaga<sup>2</sup>, and Hiroshi Hibino<sup>3,10,\*</sup>**

11 ***Table of Contents***

12

|    |                                |                                                                   |
|----|--------------------------------|-------------------------------------------------------------------|
| 13 | <b>Supplementary Figure 1</b>  | The tabletop system for electrochemical drug monitoring           |
| 14 | <b>Supplementary Figure 2</b>  | The potential protocol for electrochemical detection of pazopanib |
| 15 | <b>Supplementary Figure 3</b>  | Sample preparation procedures for electrochemical measurements    |
| 16 | <b>Supplementary Figure 4</b>  | Detection of pazopanib by different voltammetry procedures        |
| 17 | <b>Supplementary Figure 5</b>  | Optimisation of the protocol for calibration curve construction   |
| 18 | <b>Supplementary Figure 6</b>  | Calibration curves for measurements of pazopanib concentrations   |
| 19 |                                | in the plasma of systemically treated rats                        |
| 20 | <b>Supplementary Figure 7</b>  | Individual measurements of pazopanib in the plasma of the         |
| 21 |                                | systemically treated rats                                         |
| 22 | <b>Supplementary Figure 8</b>  | Calibration curves for measurements of pazopanib concentrations   |
| 23 |                                | in the plasma of systemically treated patients                    |
| 24 | <b>Supplementary Figure 9</b>  | Calibration curves built using plasma samples from multiple rats  |
| 25 |                                | by means of different BDD chips                                   |
| 26 | <b>Supplementary Figure 10</b> | Validation of a BDD chip by means of guinea pig plasma            |
| 27 |                                | containing pazopanib                                              |
| 28 | <b>Supplementary Figure 11</b> | The blueprint of the portable system for drug monitoring          |

|    |                                |                                                             |
|----|--------------------------------|-------------------------------------------------------------|
| 29 | <b>Supplementary Figure 12</b> | Individual data on pazopanib measurements with the portable |
| 30 | system                         |                                                             |
| 31 | <b>Supplementary Figure 13</b> | Electrochemical analysis of lenvatinib                      |
| 32 |                                |                                                             |
| 33 | <b>Supplementary Table 1</b>   | Optimised parameters for mass-spectrometric analysis        |
| 34 | <b>Supplementary Table 2</b>   | Lists of chip, animal, and patient IDs                      |

## Supplementary Figures

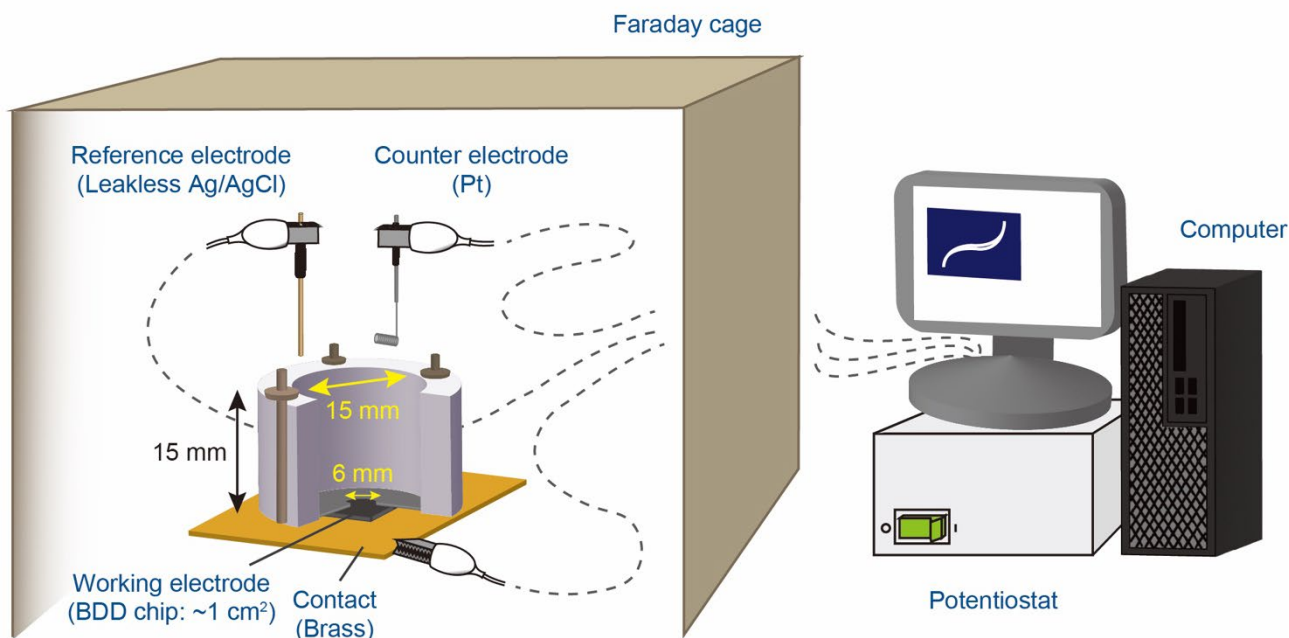

### Supplementary Figure 1 The tabletop system for electrochemical drug monitoring.

In this experimental setup, a square-shaped plate chip of 1% boron-doped diamond (BDD;  $\sim 1 \text{ cm}^2$ ) served as a working electrode and was overlaid with a small cylindrical chamber (internal diameter: 15 mm, external diameter: 21 mm, height: 15 mm, and volume: 2.3 mL), which has a hole 6 mm in diameter at the bottom. Under the BDD chip, a brass plate was placed and connected to a potentiostat regulated by a desktop computer. The chamber housed a reference electrode (Ag/AgCl) and a counter electrode (platinum: Pt). A hundred and twenty microlitres of a control or analyte-containing solution was placed in the chamber for electrochemical detection of the analyte.

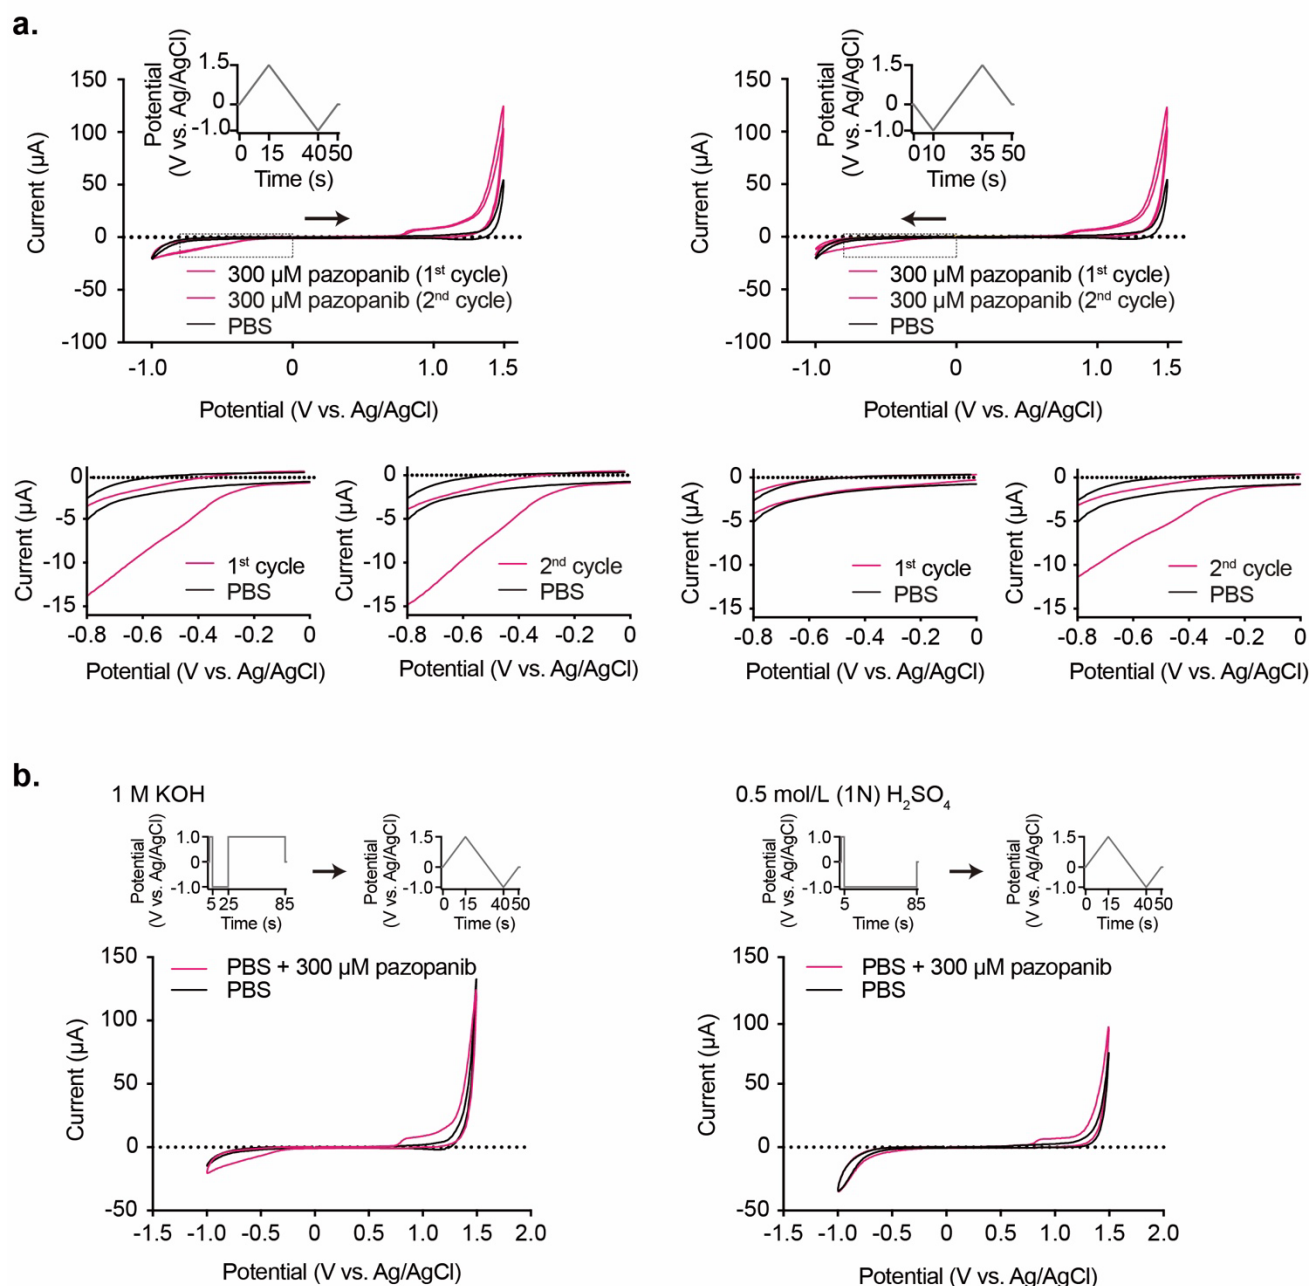

**Supplementary Figure 2 The potential protocol for electrochemical detection of pazopanib.**

**a,** Effects of different redox states of pazopanib on the electrochemical reaction. Pazopanib at 300  $\mu\text{M}$  dissolved in phosphate-buffered saline (PBS) was analysed on a boron-doped diamond (BDD) chip (chip ID: B) in the tabletop system by cyclic voltammetry via two different potential protocols as

54 follows. In *left panels*, the applied potential was scanned in the positive direction (*arrow*) from 0 to  
55 1.5 V (versus Ag/AgCl) to first oxidise pazopanib and then the potential was shifted in the negative  
56 direction to  $-1.0$  V at a sweep rate of  $0.1 \text{ V s}^{-1}$ . In *right panels*, the potential was scanned in the negative  
57 direction (*arrow*) from 0 to  $-1.0$  V (versus Ag/AgCl) to reduce the compound and then shifted in the  
58 positive direction to 1.5 V at the same sweep rate. These protocols are shown in the *insets*. The cyclic  
59 voltammetry analysis of pazopanib was carried out twice (*magenta curves*). For control data, PBS  
60 alone was tested (*black curves*). The traces marked by *doted boxes* in *upper panels* are enlarged in  
61 *lower panels*. The results indicate that the reaction of pazopanib reduction requires the oxidised form  
62 of the compound.

63 **b**, Effects of different surface conditions of a BDD chip (chip ID: B) on pazopanib detection.  
64 In the *left panel*, the chip was bathed in 1 M KOH and underwent the following protocol. After being  
65 elevated abruptly from 0 to 1.0 V (versus Ag/AgCl), the applied potential was kept at 1.0 V for 5 s,  
66 stepped to  $-1.0$  V for 20 s, clamped at 1.0 V for 60 s, and then returned to 0 V. This pre-treatment  
67 results in oxygen (O)-terminated electrode surface.<sup>1</sup> After that, the electrode was washed with ultrapure  
68 water and subjected to cyclic voltammetry analysis of PBS alone (*black curve*) or PBS containing  
69 pazopanib ( $300 \text{ }\mu\text{M}$ ) (*magenta curve*) by the protocol used in *left panels* of **a** (sweep rate:  $0.1 \text{ V s}^{-1}$ ,  
70 potential window:  $-1.0$  to 1.5 V, initial potential: 0 V versus Ag/AgCl). In the *right panel*, first, the  
71 electrode surface was hydrogen (H)-terminated in a solution containing 0.5 M  $\text{H}_2\text{SO}_4$  in a pre-treatment  
72 where the potential was kept at 1.0 V for 5 s (initial potential: 0 V) and clamped at  $-1.0$  V for 80 s.

73 After the electrode was washed with water, cyclic voltammetry analysis was performed on either PBS  
74 alone or PBS containing pazopanib (300  $\mu$ M). For potential protocols, see *insets* in the two *panels*.  
75 Note that the cathodic current induced by the drug at negative potentials was detected on the O-  
76 terminated surface (*left panel*) but not on the H-terminated surface (*right panel*).

a.

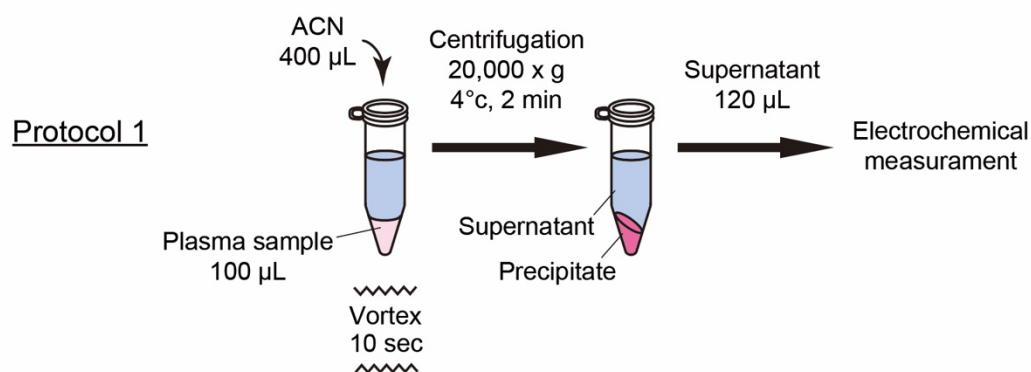

b.

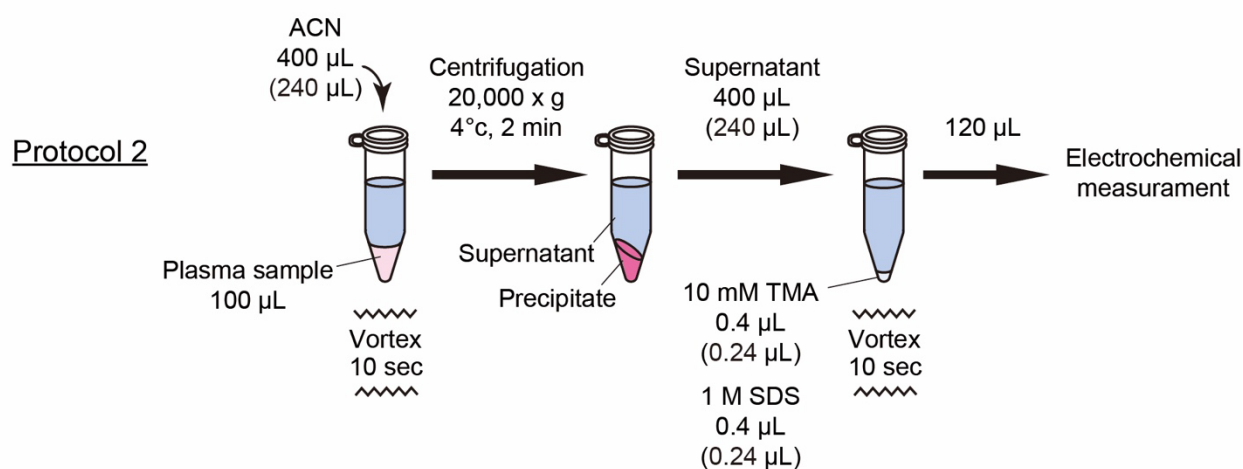

77

78

79 **Supplementary Figure 3**      **Sample preparation procedures for electrochemical**  
80 **measurements.**

81 Rat and patient plasma samples were processed for electrochemical measurement as displayed in the  
82 *panels*. In ‘Protocol 1’ (*panel a*), a rat sample was mixed with 400 µL of acetonitrile (ACN) by  
83 vortexing for 10 s and centrifuged at 20,000 × g for 2 min (4 °C). Next, 120 µL of the supernatant was  
84 subjected to the electrochemical assay (**Figure 2b**). In ‘Protocol 2’ (*panel b*), after a rat or clinical  
85 sample was treated with ACN, 400 µL of the supernatant was obtained and mixed by vortexing for 10  
86 s with a 10 mM tetramethylammonium (TMA) solution and a 1 M sodium dodecyl sulphate (SDS)



87 solution (0.4  $\mu$ L for each). Finally, 120  $\mu$ L of this sample was subjected to electrochemical  
88 measurement. This method was used for the assays in **Figures 3a–c, 5, and 6** and **Supplementary**  
89 **Figures 5, 8, 9, and 10**. For analysis of whole blood of the rats orally given pazopanib (**Figure 4** and  
90 **Supplementary Figures 6 and 7**), the volume of the plasma samples and solutions was scaled to three-  
91 fifths, as specified in parentheses.

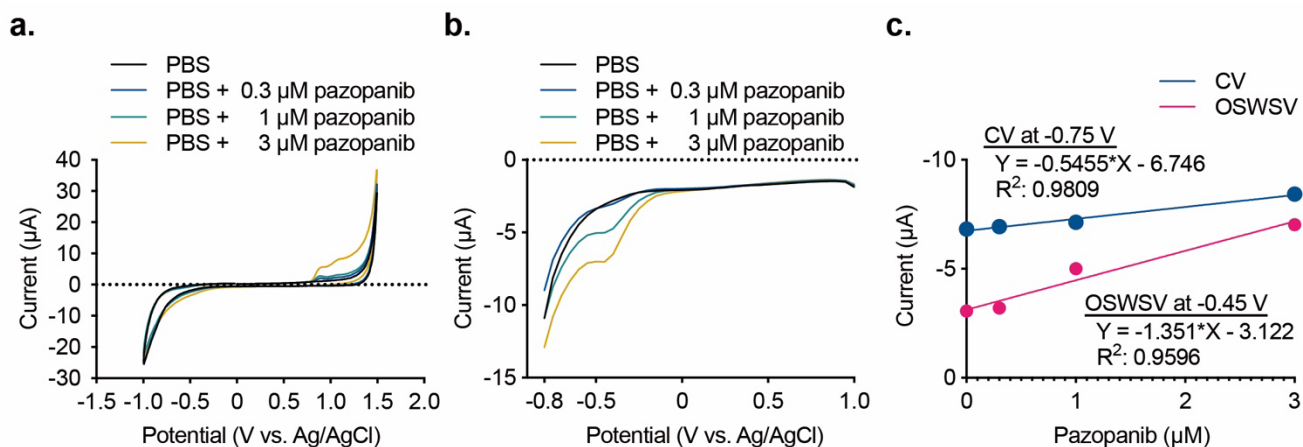

#### Supplementary Figure 4 Detection of pazopanib by different voltammetry procedures.

Phosphate-buffered saline (PBS) alone or PBS containing pazopanib at different concentrations (0.3, 1.0, or 3.0 μM) was electrochemically analysed on a boron-doped diamond (BDD) chip (chip ID: G) in the tabletop system with two different methods: cyclic voltammetry (CV) in *panel a* (sweep rate: 0.1 V s<sup>-1</sup>, potential window: -1.0 to 1.5 V, initial potential: 0 V versus Ag/AgCl) and Osteryoung square wave stripping voltammetry (OSWSV) in *panel b* (deposition potential: 1.4 V vs Ag/AgCl, deposition time: 30 s, potential range: -0.8 to 1 V, ΔE: 50 mV, square-wave frequency: 10 Hz, pulse amplitude: 50 mV). The current amplitudes at -0.75 V in the cyclic voltammogram (*a*) and those at -0.45 V in the OSWS voltammogram (*b*) are plotted in *panel c* as *blue* and *magenta curves*, respectively, as a function of the drug concentrations. The slope and  $R^2$  values of the regression lines are indicated.

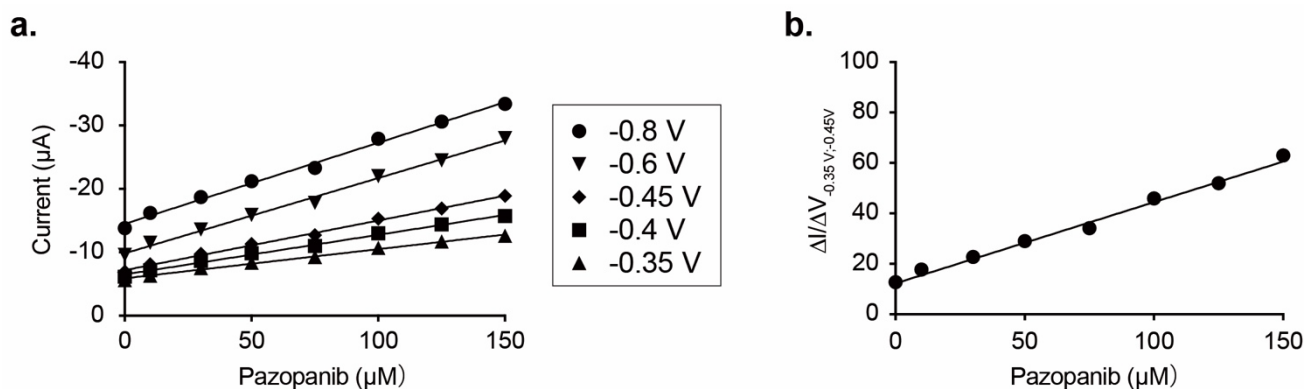

**c.**

| Sampling data                                            | Slope value | Equation               | R <sup>2</sup> value |
|----------------------------------------------------------|-------------|------------------------|----------------------|
| Current at -0.8 V                                        | -0.1279     | Y = -0.1279*X - 14.50  | 0.9942               |
| Current at -0.6 V                                        | -0.1187     | Y = -0.1187*X - 9.855  | 0.9951               |
| Current at -0.45 V                                       | -0.07823    | Y = -0.07823*X - 7.206 | 0.9967               |
| Current at -0.4 V                                        | -0.06254    | Y = -0.06254*X - 6.526 | 0.9955               |
| Current at -0.35 V                                       | -0.04602    | Y = -0.04602*X - 5.911 | 0.9943               |
| $\Delta I / \Delta V_{-0.35 \text{ V}; -0.45 \text{ V}}$ | 0.3221      | Y = 0.3221*X + 12.95   | 0.9926               |

### Supplementary Figure 5 Optimisation of the protocol for calibration curve construction.

From the voltammogram depicted in **Figure 3b** (BDD chip ID: D), the current amplitudes detected at -0.35, -0.4, -0.45, -0.6, and -0.8 V in the measurements of different pazopanib concentrations (0–150 μM) were extracted and are plotted in *panel a* to show the calibration curves. For comparison, the calibration curve from **Figure 3c**, which was obtained from  $\Delta I / \Delta V_{-0.35 \text{ V}; -0.45 \text{ V}}$  values in the voltammogram of **Figure 3b**, is displayed in *panel b*. The slope, the equation for the linear regression line fitting the data points, and  $R^2$  in each analysis are listed in *panel c*.

a.

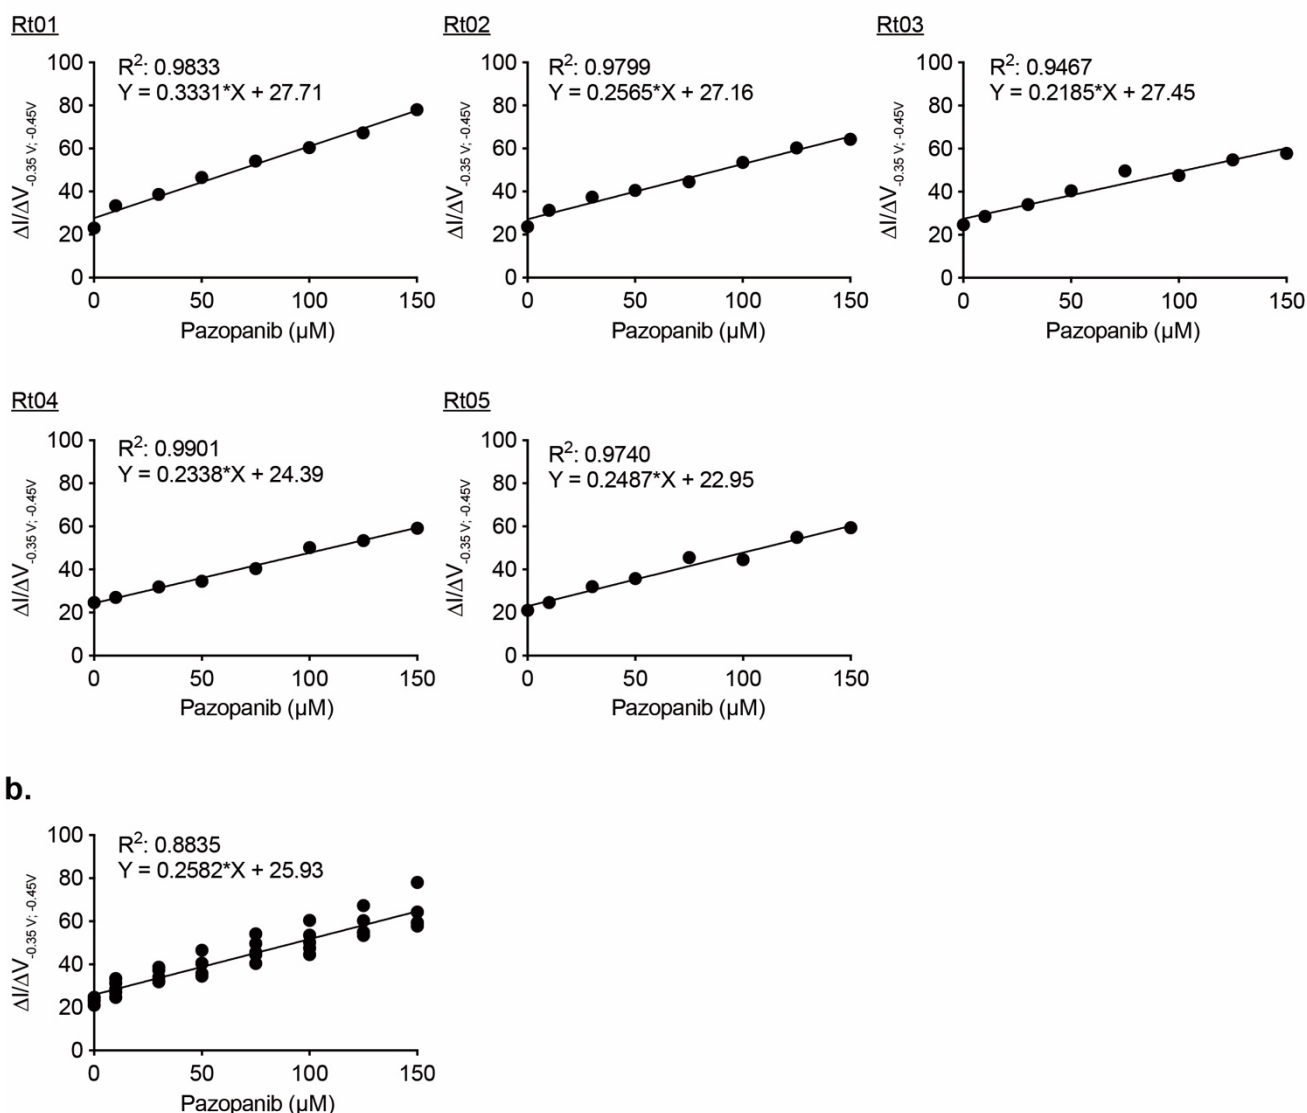

**Supplementary Figure 6 Calibration curves for measurements of pazopanib concentrations in the plasma of systemically treated rats.**

**a,** Calibration curves for individual rats. From the five rats assayed in **Figure 4**, 900  $\mu\text{L}$  of whole blood was collected immediately before oral administration of pazopanib (see the *main text* and **Methods**). The extracted plasma was spiked with the drug at different concentrations. These samples (0 to 150  $\mu\text{M}$  pazopanib; see **Figure 3b** and **c**) were electrochemically analysed using a boron-doped

121 diamond (BDD) chip in the tabletop system (chip ID: F) by Osteryoung square wave stripping (OSWS)  
122 voltammetry (for the potential protocol, see **Figure 3a**). The obtained  $\Delta I/\Delta V_{-0.35\text{ V}; -0.45\text{ V}}$  values are  
123 plotted against the drug concentrations in the *panels*. Animal ID numbers and slope and  $R^2$  values of  
124 the regression line are presented in each *panel*. These calibration curves and slope values are used in  
125 **Figure 4a–d** and **Figure 6**, respectively.

126 **b**, The ‘general’ calibration curve. In the *panel*, all the data on the five animals (*panel a*) are  
127 plotted as a function of the drug concentrations and are fitted to a regression line, whose slope and  $R^2$   
128 values are shown. This calibration curve is used in **Figure 4e–h**.

**a.**

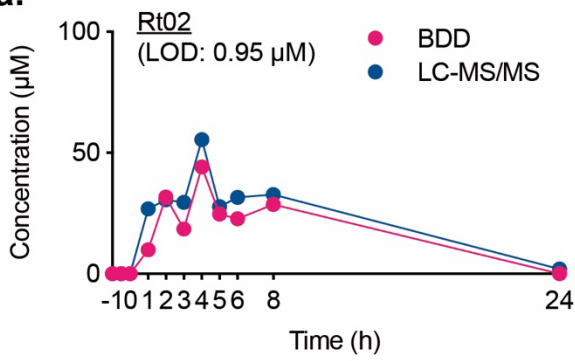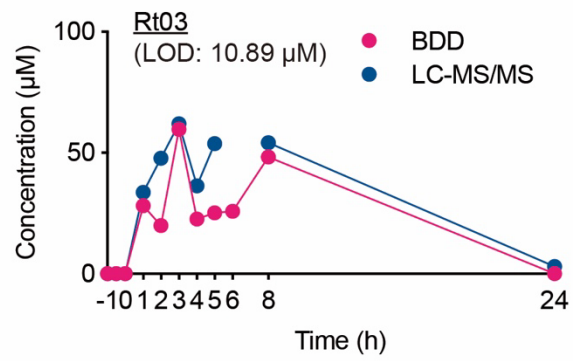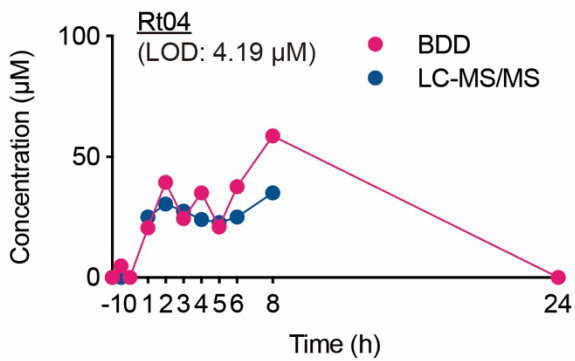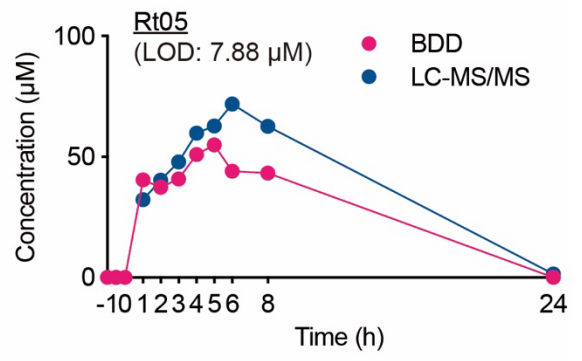

**b.**

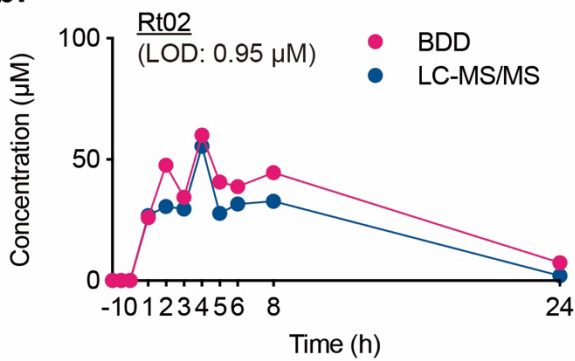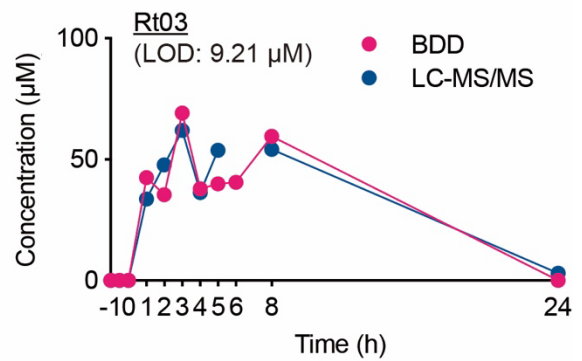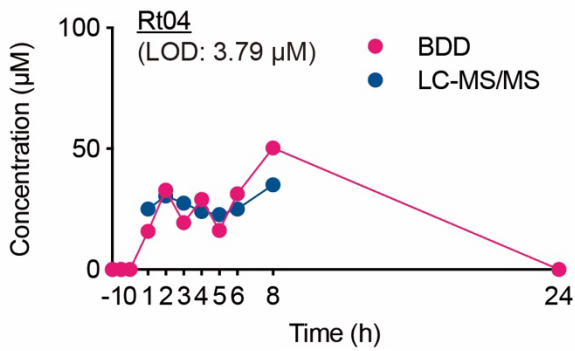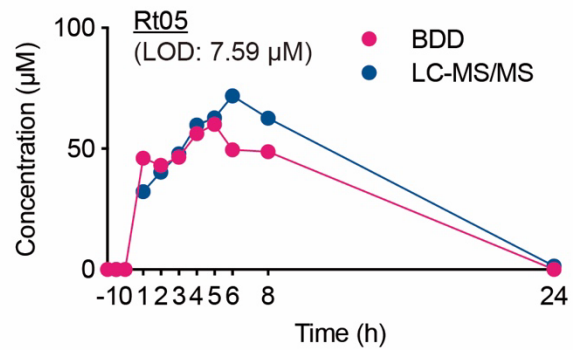

129

130

**Supplementary Figure 7                      Individual measurements of pazopanib in the plasma of the systemically treated rats.**

Shown in *panel a* are the individual data from longitudinal measurements of plasma pazopanib concentrations by the tabletop system based on a boron-doped diamond (BDD) chip (chip ID: F) and by liquid chromatography–tandem mass spectrometry (LC–MS/MS) for four healthy rats (animal IDs: Rt02–05). The experimental procedure for the electrochemical measurements was basically the same as the one used in **Figure 4a**; for each rat, to convert  $\Delta I/\Delta V_{-0.35\text{ V}; -0.45\text{ V}}$  values to analyte concentrations, an individual calibration curve was employed (**Supplementary Figure 6a** and ‘Method #1’ in the *main text*). In *panel b*, the conversion was carried out via the ‘general’ calibration curve, which was obtained in **Supplementary Figure 6b** from the data on the five rats [animal IDs: Rt01 (**Figure 4a**) and Rt02–05] (‘Method #2’ in the *main text*). Of note, as for LC–MS/MS measurements, the data at 6 hr for Rt03, those immediately before the drug administration and at 24 hr for Rt04, and those immediately and 1 hr before the drug administration for Rt05 were missing due to collection of an insufficient volume of blood (our technical error; see **Methods**). Limits of detection (LODs) obtained in the electrochemical assays are indicated in the *panels*.

a.

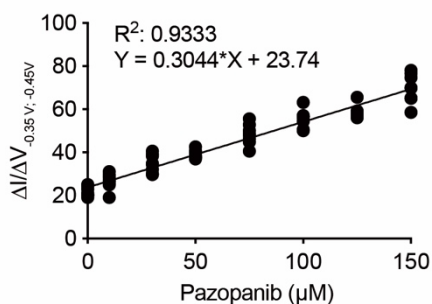

b.

Pt01

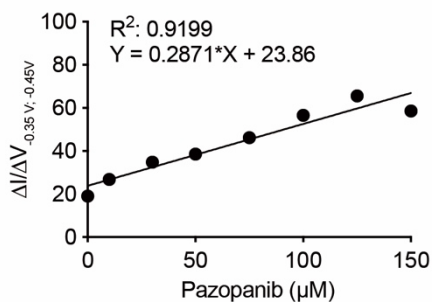

Pt02

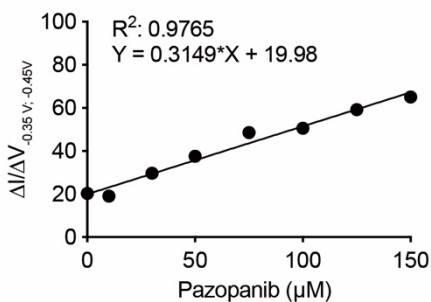

Pt03

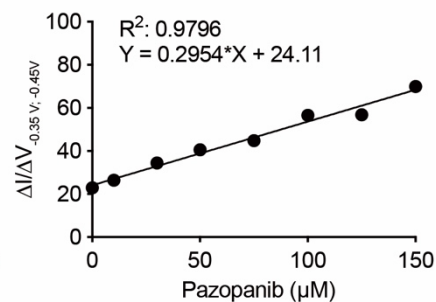

Pt04

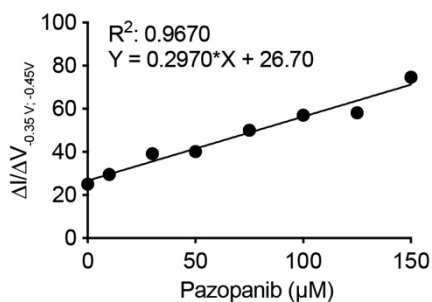

Pt05

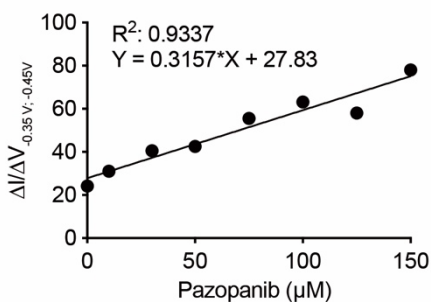

Pt06

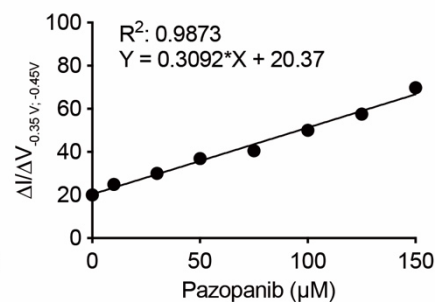

Pt07

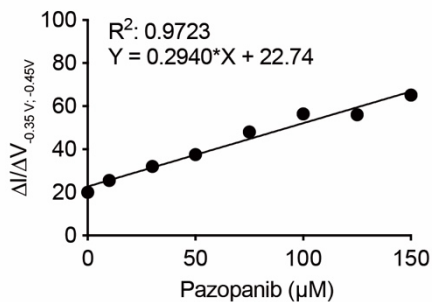

Pt08

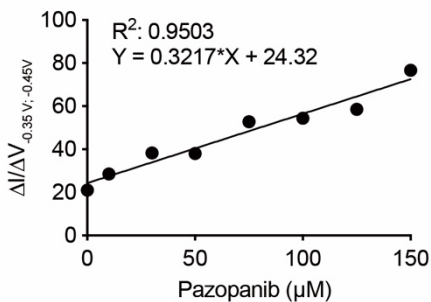

146

147

148



149 **Supplementary Figure 8                      Calibration curves for measurements of pazopanib**  
150 **concentrations in the plasma of systemically treated patients.**

151 For each of the eight patients enrolled in the clinical trial, a calibration curve was built by means of  
152 the tabletop system containing a BDD chip (chip ID: F) with a mixture of pazopanib (0–150  $\mu\text{M}$ ) and  
153 plasma isolated from whole blood collected before the oral drug administration. The procedure and  
154 protocol were identical to those in **Figure 3a–c**. *Panels a* and *b* are ‘general’ and individual calibration  
155 curves, which were used in **Figures 5a** and **6**, respectively (see the *main text*). Patient IDs are given  
156 above the *panels*.

**a.**

Rt06

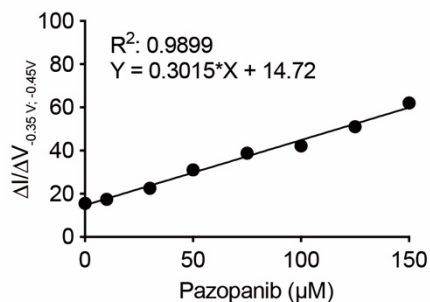

Rt07

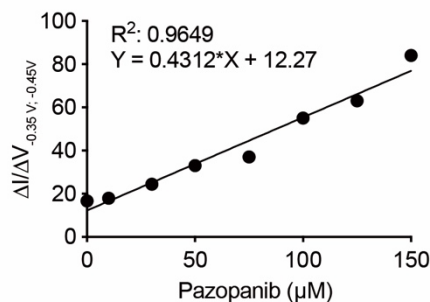

Rt08

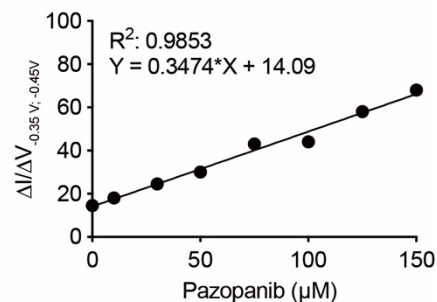

Rt09

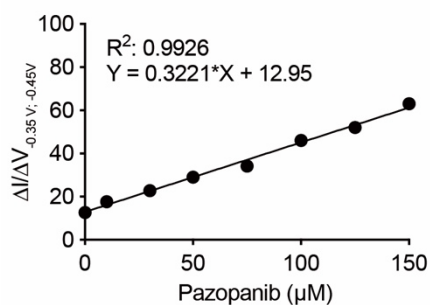

Rt10

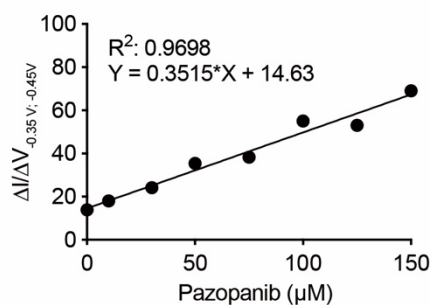

Rt11

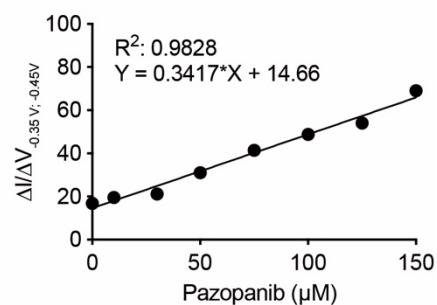

**b.**

Rt12

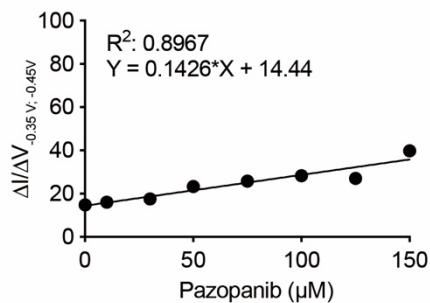

Rt13

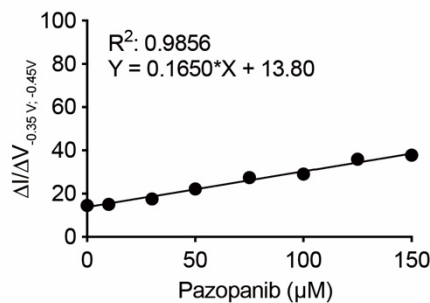

Rt14

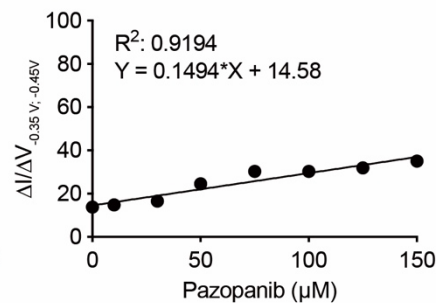

Rt15

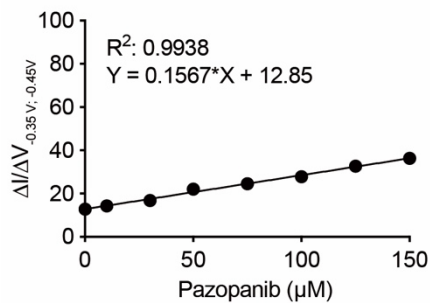

Rt16

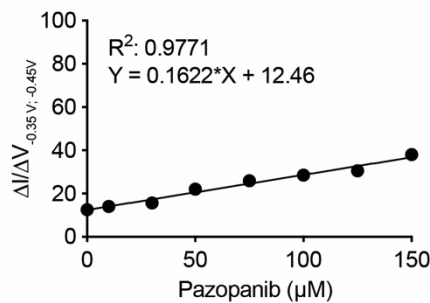

Rt17

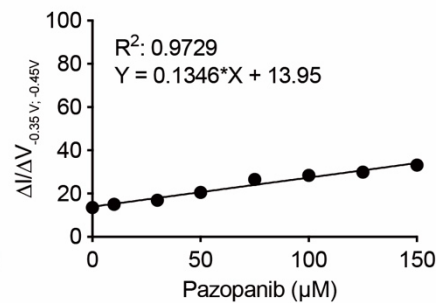

157

158

159

160    **Supplementary Figure 9                      Calibration curves built using plasma samples from multiple**  
161    **rats by means of different BDD chips.**

162    In these series of experiments, whole blood was collected from six different rats, and samples of each  
163    isolated plasma were spiked with different amounts of pazopanib (0–150  $\mu$ M). Then, the plasma  
164    samples were utilised to construct calibration curves with the help of the tabletop system containing  
165    different BDD chips (chip D for *a* and chip E for *b*). The procedure and protocol were the same as  
166    those in **Figure 3a–c**. Animal ID numbers and slope and  $R^2$  values of the regression line are shown in  
167    each *panel*. The slope values are plotted in **Figure 6**.

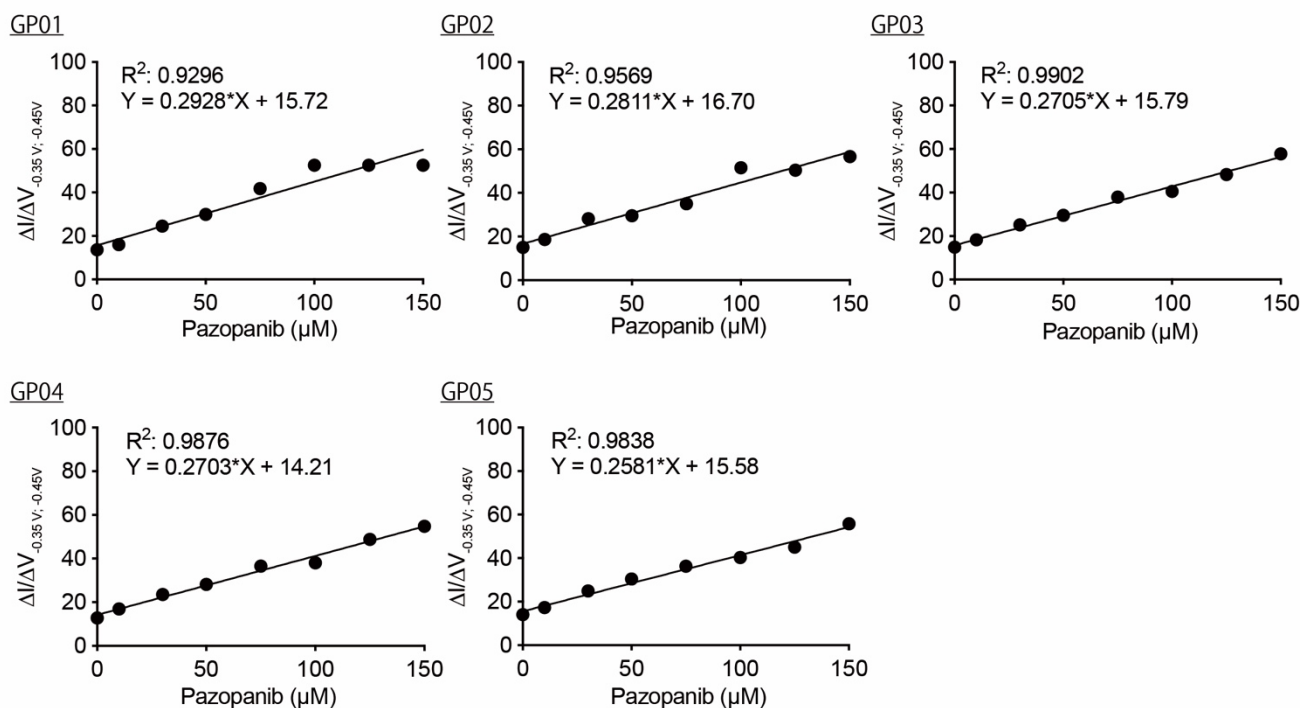

**Supplementary Figure 10 Validation of a BDD chip by means of guinea pig plasma containing pazopanib.**

In this series of experiments, which involved the tabletop system equipped with BDD chip F, the electrochemical measurement and analysis with the method described in **Figure 3a–c** were carried out for each of five guinea pigs to construct the calibration curves. Animal ID numbers and slope and  $R^2$  values of the regression line are shown in each *panel*. The slope values are plotted in **Figure 6**.

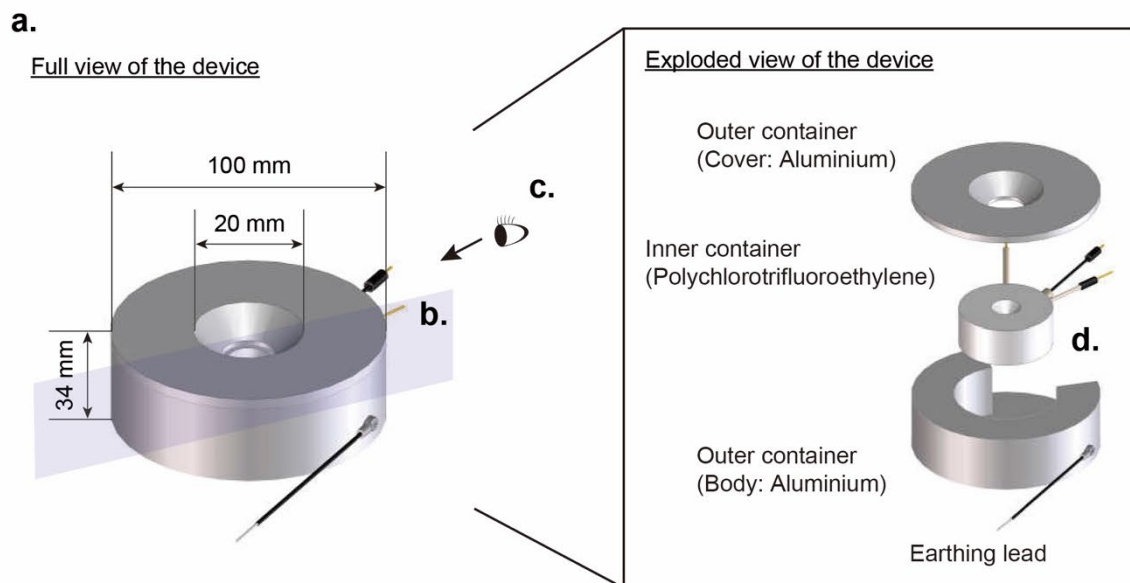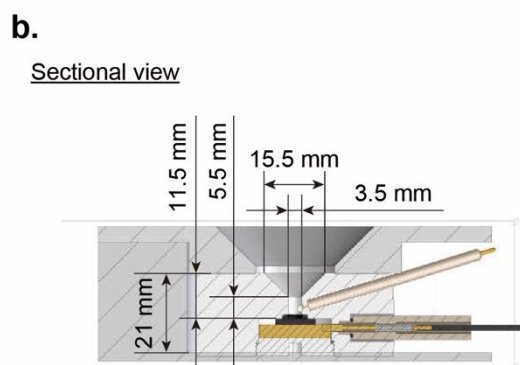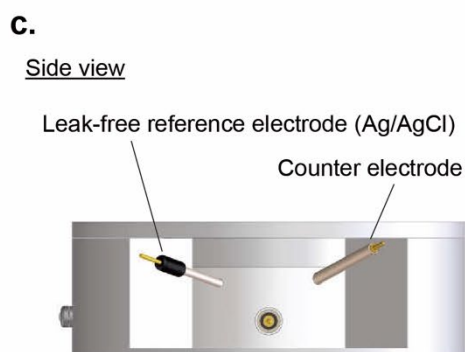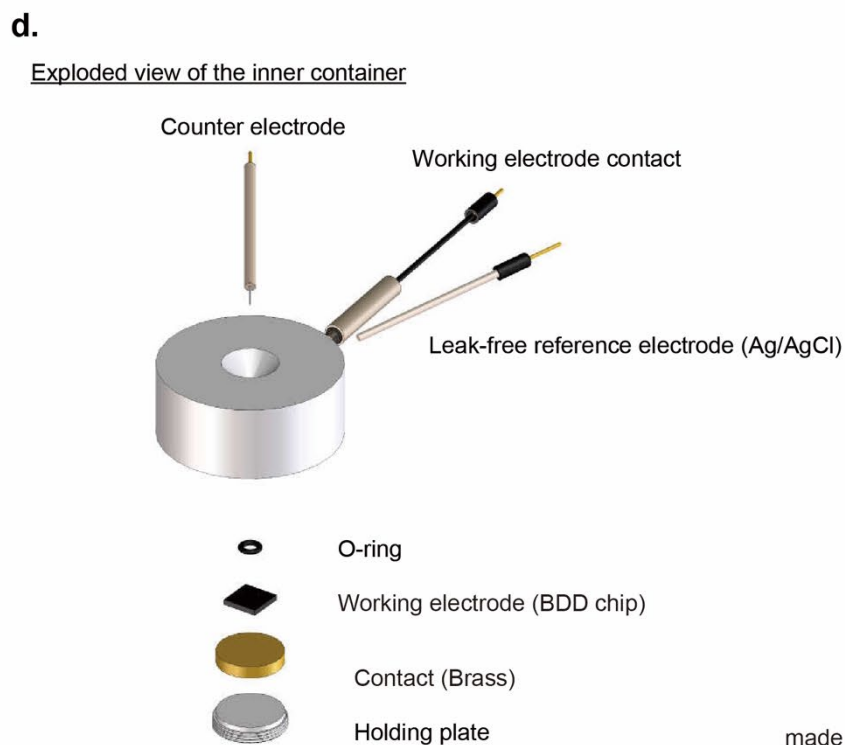

made by EC FRONTIER CO., LTD.

177    **Supplementary Figure 11            The blueprint of the portable system for drug monitoring.**

178    The outward appearance of the handheld disk-shaped measurement device is presented in the *left panel*  
179    of *a* (see also **Figure 7a**). This device is composed of an aluminium holder containing a BDD chip, an  
180    aluminium container, and a copper earthing lead (*right boxed panel*). Sectional and side views are also  
181    displayed in *panels b* and *c*, respectively, along with the size of the compartments. In *d*, the components  
182    of the holder are shown.

**a.**

1<sup>st</sup> trial

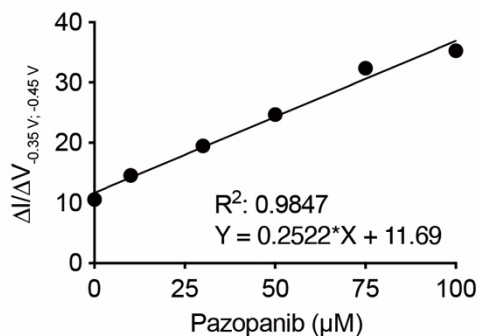

2<sup>nd</sup> trial

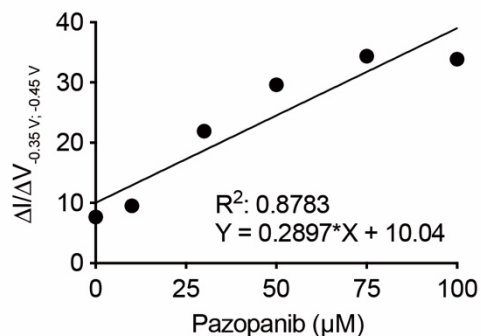

3<sup>rd</sup> trial

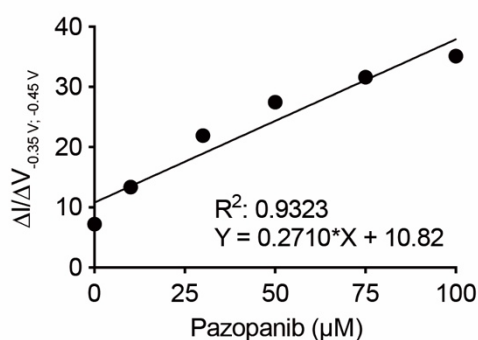

4<sup>th</sup> trial

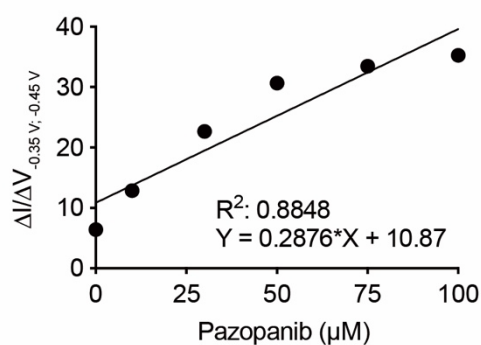

**b.**

Protocol 3

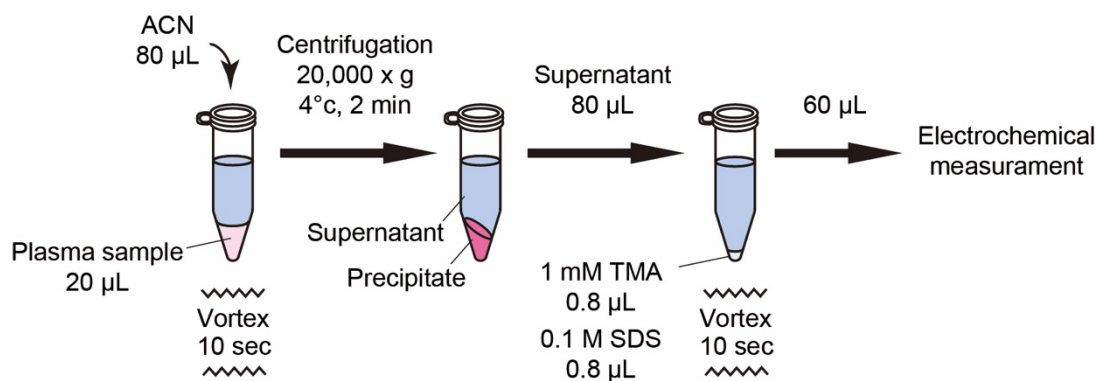

**c.**

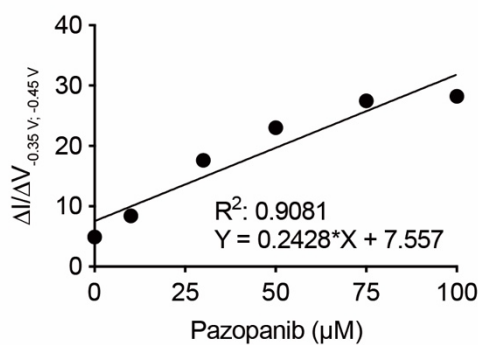

184 **Supplementary Figure 12**                      **Individual data on pazopanib measurements with the portable**  
185 **system.**

186 In *panel a*, pazopanib at different concentrations was mixed with plasma obtained from a healthy rat  
187 (animal ID: Rt18): as shown in **Figure 3a–c**, the plasma samples containing the drug at 0 to 100  $\mu\text{M}$   
188 were electrochemically assayed with a boron-doped diamond (BDD) chip (chip ID: H) in the portable  
189 system (**Figure 7a** and **Supplementary Figure 11**). This series of experiments was conducted four  
190 times (1<sup>st</sup> through 4<sup>th</sup> trial). From the raw Osteryoung square wave stripping (OSWS) voltammograms,  
191 a  $\Delta I/\Delta V_{-0.35\text{ V}; -0.45\text{ V}}$  value at each pazopanib concentration was extracted and plotted against the  
192 concentration in *the panels*. Slope and  $R^2$  values of the regression line are presented in each *panel*. The  
193 slope values are displayed in **Figure 7b**. *Panel b* describes the sample preparation procedures for the  
194 assays in **Figure 7c**. In this ‘Protocol 3’, rat plasma (20  $\mu\text{L}$ ) was mixed with 80  $\mu\text{L}$  of acetonitrile  
195 (ACN) on a vortex mixer for 10 s and centrifuged at  $20,000 \times g$  for 2 min (4  $^{\circ}\text{C}$ ). Then, 80  $\mu\text{L}$  of the  
196 supernatant was transferred to a tube that already contained 0.8  $\mu\text{L}$  of 0.1 M SDS and 0.8  $\mu\text{L}$  of 1 mM  
197 TMA, followed by vortexing for 10 s. Finally, 60  $\mu\text{L}$  of this sample was subjected to electrochemical  
198 measurement. *Panel c* shows the calibration curve generated by means of commercially available rat  
199 plasma (chip ID: I). The protocol was identical to the one in the experiments in *panel a*. The calibration  
200 curve was used for the analysis in **Figure 7c**.



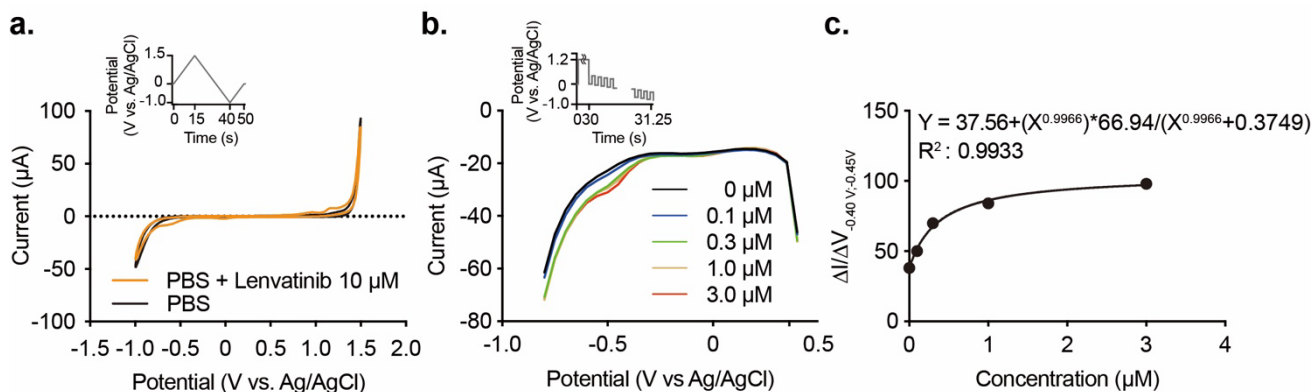

**Supplementary Figure 13 Electrochemical analysis of lenvatinib.**

**a**, The cyclic voltammogram. Either phosphate-buffered saline (PBS; *black curve*) alone or 10  $\mu\text{M}$  lenvatinib dissolved in PBS (*orange curve*) was examined in the tabletop system (BDD chip ID: J) by the potential protocol described in the *inset* (sweep rate:  $0.1 \text{ V s}^{-1}$ , potential window:  $-1.0$  to  $1.5 \text{ V}$ , and initial potential:  $0 \text{ V}$  versus  $\text{Ag/AgCl}$ ).

**b**, An Osteryoung square wave stripping (OSWS) voltammogram. Rat plasma spiked with lenvatinib at different concentrations described in the *panel* was tested in the tabletop system (BDD chip ID: J). The potential protocol (*inset*) involved the following parameters: deposition potential,  $1.2 \text{ V}$ ; deposition time,  $30 \text{ s}$ ; potential range,  $-0.8$  to  $0.4 \text{ V}$ ;  $\Delta E$ ,  $50 \text{ mV}$ ; square-wave frequency,  $20 \text{ Hz}$ ; and pulse amplitude,  $125 \text{ mV}$ .

**c**, A calibration curve. The  $\Delta I/\Delta V_{-0.35 \text{ V}; -0.45 \text{ V}}$  value at each drug concentration was extracted from the result in *panel b* and plotted. The data were fitted to the four-parameter logistic regression model, and the Hill slope and  $R^2$  value of the nonlinear regression sigmoidal curve are indicated.

216 **Supplementary Tables**

217

218 **Supplementary Table 1                      Optimised parameters for mass-spectrometric analysis**

| Parameter                     | Pazopanib | Haloperidol (internal standard) |
|-------------------------------|-----------|---------------------------------|
| Turbo ion spray temperature   | 550 °C    | 550 °C                          |
| Ion spray voltage             | −4500 V   | 5500 V                          |
| Curtain gas                   | 40 psi    | 40 psi                          |
| Collision gas                 | 9 psi     | 9 psi                           |
| Ion source gas 1              | 70 psi    | 70 psi                          |
| Ion source gas 2              | 60 psi    | 60 psi                          |
| Declustering potential        | −140 V    | 120 V                           |
| Entrance potential            | −10 V     | 10 V                            |
| Collision energy              | −42 V     | 31 V                            |
| Collision cell exit potential | −10 V     | 25 V                            |

219

220

221 **Supplementary Table 2                      Lists of chip, animal, and patient IDs**

| Display item                                            | BDD chip ID | Rat ID             | Patient ID | Guinea pig ID |
|---------------------------------------------------------|-------------|--------------------|------------|---------------|
| Figure 1                                                | A           | –                  | –          | –             |
| Figure 2                                                | C           | Rt27               | –          | –             |
| Figures 3b, 3c, and 6<br>Supplementary Figures 5 and 9a | D           | Rt06–11            | –          | –             |
| Figures 3d and 6<br>Supplementary Figure 9b             | E           | Rt12–17            | –          | –             |
| Figures 4 and 6<br>Supplementary Figures 6 and 7        | F           | Rt01–05<br>Rt23–26 | –          | –             |
| Figures 5 and 6<br>Supplementary Figure 8               | F           | –                  | Pt01–08    | –             |
| Figure 6<br>Supplementary Figure 10                     | F           | –                  | –          | GP01–05       |
| Figure 7b<br>Supplementary Figure 12a                   | H           | Rt18               | –          | –             |
| Figure 7c<br>Supplementary Figure 12b                   | I           | Rt19–22            | –          | –             |
| Supplementary Figure 2                                  | B           | –                  | –          | –             |
| Supplementary Figure 4                                  | G           | –                  | –          | –             |
| Supplementary Figure 13                                 | J           | Rt28               | –          | –             |

222    **References for Supplementary Figure Legends**

- 223    1.      Muzyka, K., *et al.* Boron-doped diamond: current progress and challenges in view of  
224      electroanalytical applications. *Analytical Methods* **11**, 397-414 (2019).

225
